# Supplementary material
Source: PubMed Central journal article supplement (PMC3589257)
Supplement: supp_djs645_jnci_JNCI_12_0921_s01.pdf [file supp_djs645_jnci_JNCI_12_0921_s01.pdf]

**Supplementary table 1:** Comorbidities abstracted among women aged 66-89 years that underwent screening mammography between 1999 and 2006

| <b>Condition</b>             | <b>Charlson score weight</b> |
|------------------------------|------------------------------|
| Osteoarthritis               | 1                            |
| Peripheral vascular disease  | 1                            |
| Diabetes (mild)              | 1                            |
| Diabetes (moderate)          | 1                            |
| Diabetes (severe)            | 2                            |
| Renal disease (mild)         | 0                            |
| Renal disease (moderate)     | 2                            |
| Renal disease (severe)       | 2                            |
| Liver disease (mild)         | 1                            |
| Liver disease (moderate)     | 3                            |
| Liver disease (severe)       | 3                            |
| Arthritis                    | 1                            |
| Peptic ulcer                 | 1                            |
| Cerebrovascular disease      | 1                            |
| Osteoporosis                 | 1                            |
| Congestive heart disease     | 1                            |
| Pulmonary disease (mild)     | 0                            |
| Pulmonary disease (moderate) | 1                            |
| Pulmonary disease (severe)   | 1                            |
| Myocardial infarction        | 1                            |
| Dementia                     | 1                            |
| Other dementia               | 1                            |
| Rheumatological disease      | 1                            |
| Coagulopathy                 | 2                            |
| Other non-metastatic cancer  | 2                            |
| Other metastatic cancer      | 6                            |
| AIDS                         | 6                            |
